# 1 Illumina-based sequencing framework for accurate detection and 2 mapping of influenza virus defective interfering particle-associated 3 RNAs

4  
5 Fadi G. Alnaji<sup>1</sup>, Jessica R. Holmes<sup>2,3</sup>, Gloria Rendon<sup>2,3</sup>, J. Cristobal Vera<sup>1,2</sup>, Chris  
6 Fields<sup>2,3</sup>, Brigitte E. Martin<sup>1</sup>, and Christopher B. Brooke<sup>\*1,2</sup>

7  
8 <sup>1</sup>Department of Microbiology, University of Illinois at Urbana-Champaign

9 <sup>2</sup>Carl R. Woese Institute for Genomic Biology, University of Illinois at Urbana-  
10 Champaign

11 <sup>3</sup>High Performance Biological Computing at the Roy J. Carver Biotechnology Center,  
12 University of Illinois at Urbana-Champaign

13 \* Corresponding author (cbrooke@illinois.edu)

## 14 15 **Abstract**

16 The mechanisms and consequences of defective interfering particle (DIP) formation  
17 during influenza virus infection remain poorly understood. The development of next  
18 generation sequencing (NGS) technologies has made it possible to identify large numbers  
19 of DIP-associated sequences, providing a powerful tool to better understand their  
20 biological relevance. However, NGS approaches pose numerous technical challenges  
21 including the precise identification and mapping of deletion junctions in the presence of  
22 frequent mutation and base-calling errors, and the potential for numerous experimental  
23 and computational artifacts. Here we detail an Illumina-based sequencing framework and  
24 bioinformatics pipeline capable of generating highly accurate and reproducible profiles of  
25 DIP-associated junction sequences. We use a combination of simulated and experimental  
26 control datasets to optimize pipeline performance and demonstrate the absence of  
27 significant artifacts. Finally, we use this optimized pipeline to generate a high-resolution  
28 profile of DIP-associated junctions produced during influenza virus infection and  
29 demonstrate how this data can provide insight into mechanisms of DIP formation. This  
30 work highlights the specific challenges associated with NGS-based detection of DIP-  
31 associated sequences, and details the computational and experimental controls required  
32 for such studies.

## 33 34 **Importance**

35 Influenza virus defective interfering particles (DIPs) that harbor internal deletions within  
36 their genomes occur naturally during infection in humans and cell culture. They have been  
37 hypothesized to influence the pathogenicity of the virus; however, their specific function  
38 remains elusive. The accurate detection of DIP-associated deletion junctions is crucial for  
39 understanding DIP biology but is complicated by an array of technical issue that can bias  
40 or confound results. Here we demonstrate a combined experimental and computational  
41 framework for detecting DIP-associated deletion junctions using next generation  
42 sequencing (NGS). We detail how to validate pipeline performance and provide the  
43 bioinformatics pipeline for groups interested in using it. Using this optimized pipeline, we

44 detect hundreds of distinct deletion junctions generated during IAV infection, and use  
45 these data to test a long-standing hypothesis concerning the molecular details of DIP  
46 formation.

47

## 48 **INTRODUCTION**

49 Influenza A virus (IAV) DIPs were first described over 60 years ago, and are classically  
50 defined by their ability to interfere with the production of wild-type virus(1, 2). This ability  
51 has been linked to the ability of DI RNAs to both outcompete wild-type (WT) genomic  
52 RNAs for resources and packaging into virions, as well as to more potently stimulate the  
53 induction of anti-viral immunity through cytosolic RNA sensors (3–6). DIPs have also been  
54 implicated in influencing the outcome of influenza virus infection in humans(7). The  
55 specific mechanisms and broader functional consequences of DIP formation during IAV  
56 infection remain poorly understood.

57

58 IAV DIPs are characterized by the presence of large internal deletions in one or more  
59 genome segments that disrupt essential open reading frames while retaining the  
60 sequences required for replication and packaging(5). As such, the mapping of DIP-  
61 associated deletions has helped to define the minimum sequences required for genome  
62 replication and packaging (8, 9). These deletions are believed to result from a poorly  
63 defined process by which the viral RNA-dependent RNA polymerase (RdRp) ceases RNA  
64 polymerization at one site of the viral RNA template (donor site), only to resume at another  
65 site downstream (acceptor site), resulting in a failure to copy an internal stretch of the WT  
66 template (10). Until recently, the ability to characterize these DIP-associated deletion  
67 junction sites (breakpoints) has been limited based on the need to clone and Sanger  
68 sequence individual DIP-associated RNAs. As a result, the number of individual DIP-  
69 associated RNA sequences that have been analyzed has been relatively small, hindering  
70 efforts to define the factors that govern DIP deletion formation.

71

72 The advent of next generation sequencing (NGS) has increased the number of individual  
73 recombinant sequences that can be identified within a given sample by orders of  
74 magnitude. However, the identification and analysis of DIP-associated RNAs by NGS  
75 poses new challenges, including the successful alignment of junction-containing (or  
76 junction-spanning) reads to the viral reference sequence, the precise definition and  
77 localization of DIP-associated deletion breakpoints, and the differentiation of true DIP  
78 deletion sequences from the artifactual recombinants that can form during reverse  
79 transcription, PCR, and/or sequencing. Without careful optimization and validation, these  
80 issues can easily compromise efforts to define the genetic profile of DIP populations.

81

82 Here, we describe the development and validation of an Illumina-based sequencing  
83 framework for the identification and analysis of influenza virus DIP-associated deletion  
84 junctions. The bioinformatics pipeline combines the Bowtie 2 alignment algorithm with the  
85 ViReMa (Virus Recombination Mapper) algorithm developed by Andrew Routh and a  
86 collection of additional scripts for data processing and analysis (11, 12). We used  
87 simulated NGS datasets and a panel of experimental control samples to optimize and

88 quantify the sensitivity, precision, and reproducibility of our pipeline. Subsequently, we  
89 used the optimized pipeline to fine-tune the experimental protocol from sample  
90 preparation to RNA sequencing to better detect and map DIP-associated deletions  
91 generated during experimental IAV infection. This work highlights the computational and  
92 experimental controls needed for Illumina-based NGS studies of viral recombination, and  
93 provides an optimized, user-friendly sequencing and bioinformatics pipeline for the  
94 identification and analysis of IAV DIP-associated sequences. Higher resolution analysis  
95 of these deletion sequences can shed light on both the specific molecular mechanisms  
96 of DIP formation, as well as how DIPs may affect the overall behavior of viral populations.

97

## 98 RESULTS

### 99 Overview of the pipeline

100 The sequencing framework we describe here encompasses sample preparation,  
101 sequencing, and data analysis (**Fig 1A**). In brief, we generate 8-segment, full-length  
102 amplicons from viral samples and sequence these using the Illumina MiSeq sequencing  
103 platform. Datasets are quality-filtered and aligned to the viral reference genome using  
104 Bowtie 2 in a conservative manner that disallows soft clipping. Thus, reads containing  
105 deletion junctions fail to align, and are fed into the ViReMa algorithm to detect DIP-  
106 associated deletion junctions. Finally, the identified junctions are mapped to the viral  
107 genome and output as a matrix containing the segment name, junction start and end sites,  
108 and NGS read support that can easily be analyzed using additional software tools. Below,  
109 we outline the approaches we have taken to optimize and validate the various steps in  
110 the process.

111

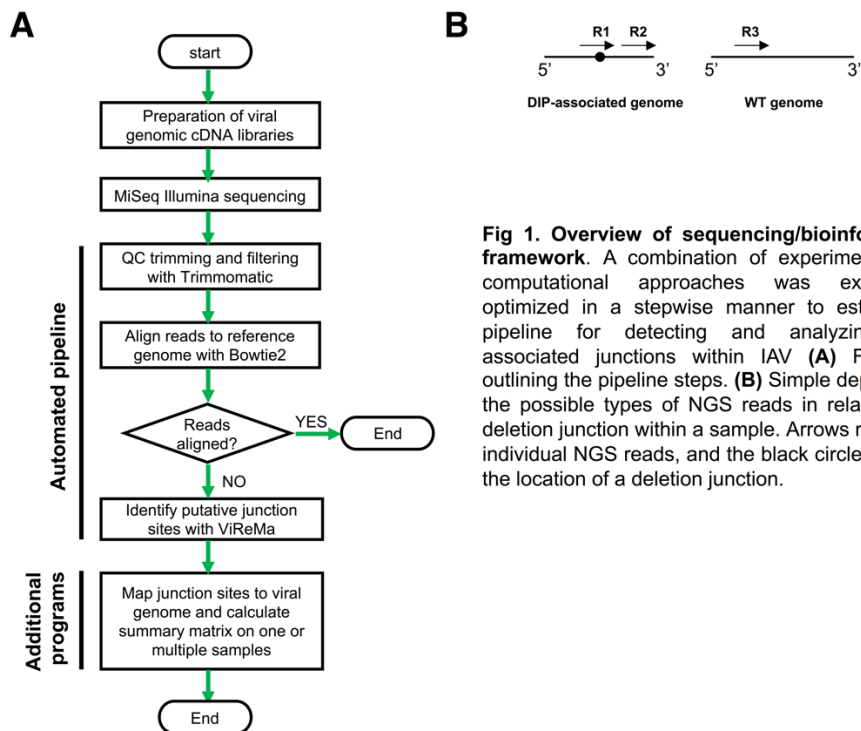

**Fig 1. Overview of sequencing/bioinformatics framework.** A combination of experimental and computational approaches was extensively optimized in a stepwise manner to establish a pipeline for detecting and analyzing DIP-associated junctions within IAV (**A**) Flowchart outlining the pipeline steps. (**B**) Simple depiction of the possible types of NGS reads in relation to a deletion junction within a sample. Arrows represent individual NGS reads, and the black circle denotes the location of a deletion junction.

112

113

## 114 Optimization of analysis pipeline using simulated data

115 All bioinformatic pipelines have the potential to introduce artifacts and biases during data  
116 analysis. Therefore, we first aimed to optimize the sensitivity and precision of our  
117 bioinformatics pipeline using simulated NGS datasets where we absolutely know the  
118 identity and frequency of all DIP-associated deletion sequences present. IAV DIP-  
119 associated deletions can be found in nearly all (if not all) genome segments at a wide  
120 range of frequencies (13, 14). To mimic this natural variation, we used MetaSim to  
121 generate a panel of Illumina MiSeq-based NGS simulated datasets that contain DIP-  
122 associated deletions in all genome segments at varying frequencies and locations (see  
123 **Table 1, Fig S1**). We used a simple Perl script to randomly generate deletion junctions  
124 within the terminal ~600nts of A/California/07/09 (Cal07), since these regions have been  
125 shown to be hotspots for DIP-associated deletions(9, 13, 15). We also generated a  
126 negative control dataset that lacks deletions to quantify the occurrence of false positives  
127 generated by the pipeline. Critically, we introduced a nucleotide substitution frequency of  
128 ~1% into these datasets, based on the published Illumina MiSeq empirical error model(16,  
129 17). Each dataset comprised ~1million 2x250nts paired-end reads, mirroring the read  
130 depth that we expect per sample on a typical sequencing run.  
131

| Dataset name | Total paired-end reads           | Total junction count | Total junction NGS reads | Total WT NGS individual reads | Junction count |     |    |    |    |    |    |    |
|--------------|----------------------------------|----------------------|--------------------------|-------------------------------|----------------|-----|----|----|----|----|----|----|
|              |                                  |                      |                          |                               | PB2            | PB1 | PA | HA | NP | NA | M  | NS |
| Cal07-400    | ~1 million (2X250).              | 400                  | 1838898                  | 116548                        | 50             | 50  | 50 | 50 | 50 | 50 | 50 | 50 |
| Cal07-200    | Total 2 million individual reads | 200                  | 1774920                  | 225080                        | 25             | 25  | 25 | 25 | 25 | 25 | 25 | 25 |
| Cal07        |                                  | 0                    | 0                        | 2000000                       | 0              | 0   | 0  | 0  | 0  | 0  | 0  | 0  |

132 **Table 1.** Description of the simulated datasets used in this study.

133

## 134 Optimization of alignment

135 We first optimized the filtering of reads that contain deletion junctions (**Fig 1B, R1**), from  
136 those that don't include junctions (**Fig 1B, R2,R3**). To do this, we aligned all reads to the  
137 WT reference genome using Bowtie 2. Reads that successfully align should not contain  
138 deletion junctions and are saved for further analysis, while reads that fail to align are fed  
139 through the ViReMa algorithm. The performance of this alignment step is highly  
140 dependent upon the mismatch penalty scores that are used during alignment. If mismatch  
141 penalties are too stringent, reads with random mutations or base calling errors will fail to  
142 align and be sent to ViReMa, increasing both the chances of false positives and the total  
143 computational time per sample; too lenient, and true junction-spanning reads will  
144 successfully align and be excluded from downstream analysis.

145

146 We used a junction-rich simulated dataset (Cal07-400) to test the effects of varying the  
147 alignment penalty score on the output of ViReMa (**Fig 2A**). We observed that a penalty  
148 score of 0.3 minimized the number of unaligned reads (and thus potential for false  
149 positives) without diminishing the number junction-spanning reads detected. This value  
150 was used for all subsequent analysis.

151  
152  
153  
154  
155  
156  
157  
158  
159  
160  
161

## Optimization of ViReMa operation

We next optimized the sensitivity and precision with which the pipeline detects deletion junctions. The ability of ViReMa to accurately map true junction-containing reads is affected by three factors. The first is the method the algorithm uses to identify breakpoints. ViReMa extracts and aligns a seed sequence of 20-30nts (the default value of 25 was used in this study) from the beginning of each read and begins aligning the downstream nucleotides. If at any point the downstream alignment fails (as would be the case for a deletion breakpoint), ViReMa generates a new seed sequence starting from that location for realignment. Thus, breakpoints cannot be detected if they occur within the terminal 25 nts of a read.

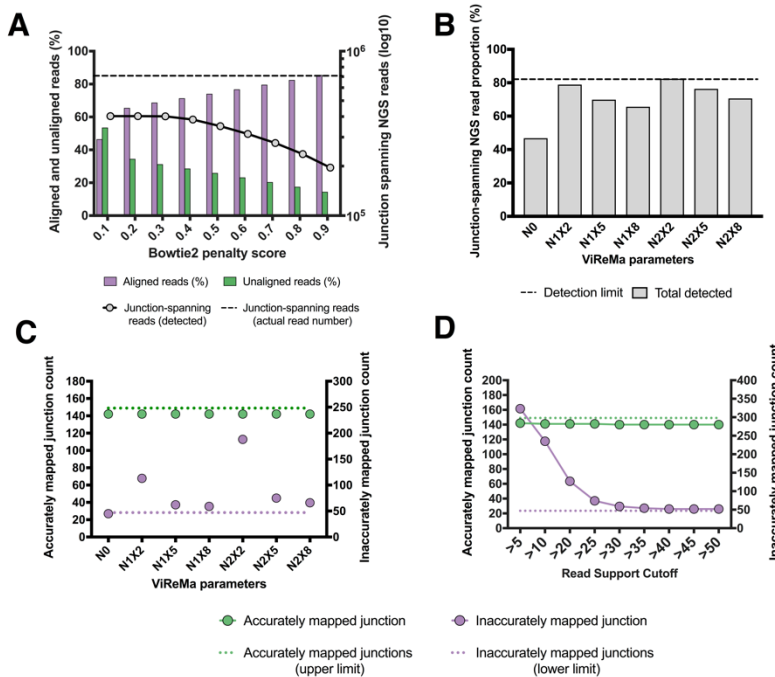

**Fig 2. Optimization of bioinformatics pipeline using simulated data.** (A) Quantification of the effects of varying the bowtie 2 penalty score on the number of junction spanning reads detected by ViReMa in the Cal07-400 simulated dataset (black line; dashed line represents the actual number of junction-spanning reads present in the dataset). The percentages of reads that aligned to reference genome (purple) and failed to align (green) are also shown for each penalty score. (B) The effects of ViReMa --X and --N parameters on the percentage of junction spanning reads present in the simulated dataset that were successfully detected. Dashed line shows the maximum theoretical sensitivity (~81.5%), based on the ViReMa seed length of 25nts. (C) The effects of ViReMa --X and --N parameters on the number of accurately (green) and inaccurately mapped (purple) deletion junctions reported by the pipeline using the Cal07-200 simulated dataset. The maximum possible number of accurate junctions and the minimum number of inaccurate junctions (resulting from junctions adjacent to direct repeat sequences) are shown for comparison (D) Effects of varying the minimum read support cutoff (RSC) on junction detection. Analysis performed on the Cal07-200 simulated dataset using N1X8 ViReMa values.

162

The second factor is the presence of short direct repeats adjacent to the junction site. These repeats result in a situation where multiple potential breakpoints can give rise to the same final sequence, making precise definition of the true breakpoints impossible (**Fig S2 and S3A**). ViReMa deals with these 'fuzzy' regions through the parameter 'Defuzz', which can be set to report the junction either to the 5' end, 3' end, or the middle of the ambiguous region. For consistency's sake, we pushed all fuzzy junctions towards the 3' of the ambiguous region. The effects of direct repeats on breakpoint mapping are impossible to avoid and vary somewhat between IAV genome segments. Importantly, while this effect reduces the precision of breakpoint mapping, it does not affect the ability of the pipeline to determine the actual sequences of DIP-associated RNAs.

The third factor is the potential for base calling errors or mutations to result in erroneous junction mapping (**Fig S3B**). Even though reported junctions in this category are derived from real junctions, they can be viewed as false positives in that they are reported as

173  
174  
175

176 distinct junctions that do not actually exist in the viral population. Altogether, these three  
177 factors set a ceiling on the maximum number of deletion junctions that can be accurately  
178 detected and mapped. Using our simulated datasets, we knew how many deletion  
179 junctions actually existed, exactly where they were located, and whether or not they were  
180 adjacent to direct repeats (see Materials and Method) that could result in incorrect  
181 mapping. This allowed us to systematically optimize the sensitivity and precision of the  
182 software pipeline.

183  
184 We tested how varying the ViReMa operating parameters affected both junction-spanning  
185 read detection and actual junction reporting. We used the Cal07-200 dataset to challenge  
186 ViReMa across a range of --N parameter (number of mismatches allowed) and --X  
187 parameter (mismatch distance from the putative junction location) values. We first asked  
188 how varying the --N and --X parameters influenced the total number of junction-spanning  
189 reads detected (**Fig 2B**). We found that using N=0 (--X is irrelevant at this condition)  
190 significantly decreased the number of junction-spanning reads detected compared with  
191 non-zero --N and --X values. We next asked how increasing the --N and --X values  
192 affected the number of accurately and inaccurately mapped junctions reported (**Fig 2C**).  
193 We observed a clear correlation between the --X parameter and junction-mapping  
194 precision, as increasing the --X value decreased the number of inaccurately mapped  
195 junctions. Overall, we found that using N=1 and X=8 reduced inaccurate junction mapping  
196 to the minimum amount possible, given the occurrence of direct repeats adjacent to  
197 23.5% (47 of 200) of junctions in the dataset.

198  
199 We next asked whether setting a minimum read support cutoff (RSC) to report a junction  
200 affected the numbers of both accurate and inaccurate junctions that the pipeline identified.  
201 Requiring that a given junction be represented within a minimum number of reads can  
202 decrease the number of erroneously mapped junctions arising from base calling errors  
203 but could also result in some true junctions being lost due to insufficient read coverage.  
204 We aligned our simulated Cal07-200 dataset with Bowtie 2 and used the resulting  
205 unaligned reads to challenge ViReMa using different RSC values (**Fig 2D**). We found that  
206 the number of true junctions reported by the pipeline was very close to the theoretical  
207 maximum, with minimal drop-off across the range of RSCs tested. In contrast, we  
208 observed that the number of inaccurately reported junctions was highly sensitive to the  
209 RSC value used. An RSC of >30 was needed to lower the number of inaccurately reported  
210 junctions to the minimal limit (determined by the number of 'fuzzy' junctions with adjacent  
211 direct repeats in the dataset).

212  
213 Altogether, these data highlight the importance of optimizing RSC values and the ViReMa  
214 --N and --X parameters for maximizing the sensitivity of junction detection while  
215 minimizing the number of false positives. We set our default values at RSC>30, --N=1,  
216 and --X=8 for subsequent analysis.

## 217 218 **Validation of sequencing pipeline**

219 After optimizing the bioinformatics component of our pipeline using simulated datasets,

220 we examined the ability of the pipeline to detect DIP-associated deletions within complex  
221 viral populations from experimental samples. Our overall strategy was based on the  
222 universal, eight segment RT-PCR approach pioneered by Zhou et al. (18). Critically, there  
223 are a number of steps within the library preparation and sequencing steps that have the  
224 potential to introduce artifacts that can compromise junction detection and analysis. In  
225 particular, we were concerned about the potential for recombination during reverse  
226 transcription, PCR, and/or sequencing to generate junctions that will be called by the  
227 pipeline (19, 20). To address this, we prepared several control sample libraries,  
228 sequenced them on the MiSeq, and ran the results through our optimized pipeline.

229  
230 To quantify false positive generation during the PCR and/or sequencing steps, we  
231 constructed libraries without using actual viral RNA or reverse transcriptase. To do this,  
232 we generated an equimolar ratio mixture of full length PCR amplicons from each of the  
233 eight IAV genome segments, using reverse genetics plasmids encoding the gene  
234 segments from A/Puerto Rico/8/1934 (PR8) as templates. These amplicons were gel  
235 purified to ensure correct, full-length size, and then used as template for the universal  
236 amplification PCR and subsequent library preparation. Our analysis pipeline detected no  
237 breakpoints in this control, indicating that none of the steps in our pipeline from PCR  
238 onwards were significant sources of false positive signals.

239  
240 We next sequenced a recombinant Cal07 stock that was grown under low MOI conditions  
241 to minimize the frequency of DIPs (21). We performed two independent RNA extractions  
242 and reverse transcription reactions on this stock to serve as technical replicates (named  
243 Par1 and Par2). ViReMa detected 6 and 7 DIP-associated deletion junctions from Par1  
244 and Par2, respectively, with junction-spanning reads representing ~0.1-0.2% of the total  
245 reads (**Fig 3A**). The majority of these reads were derived from a single shared deletion  
246 junction in HA (indicated by the following nomenclature: 615\_1132\_HA). 4 other DIP  
247 junctions were shared between replicates, each with low NGS read depth (ranging  
248 between 19 and 94). Two unshared junctions in Par1 and one in Par2 were actually  
249 reported in both replicates but failed to reach the level of detection in one replicate.

250  
251 The significant overlap in the specific junctions that were reported from the two replicates  
252 suggested that these junctions were produced by the viral polymerase (and were thus  
253 bona fide DIP-associated sequences) rather than by the reverse transcriptase. However,  
254 the generation of the same junction in independent RT reactions could also indicate the  
255 existence of strong hotspots for RT recombination. To more directly address the potential  
256 contribution of RT-derived recombinants, we performed two independent experiments.  
257 First, we compared the junctions detected in HA segment libraries generated from Par 1  
258 using two different RT enzymes, Invitrogen Superscript III and Agilent AccuScript.  
259 Second, we performed *in vitro* transcription of a plasmid-derived Cal07 HA segment using  
260 T7 RNA polymerase, which then was used as a template for RT-PCR to produce the  
261 amplicon library for sequencing. The IAV polymerase was not involved in this control; thus  
262 any deletions detected will have been generated by T7 polymerase or the RT enzyme.

263

264 The junctions reported from libraries generated by the two RT enzymes had significant  
265 overlap and were both dominated by 615\_1132\_HA (**Fig 3B**). In contrast, we detected  
266 none of the Par1-derived junctions in the library generated from T7-transcribed HA (**Fig**  
267 **3B**). Although the read depth coverage was comparable to Par1, 615\_1132\_HA was  
268 completely absent, and the three junctions that were detected had minimal read support  
269 and were not seen in virus-derived libraries. Altogether, these results suggest that the  
270 formation of deletion junctions during the reverse transcription reaction is rare, and that  
271 the Par1-derived junctions we observed are most likely derived from true DIPs present  
272 within our viral stock, despite the stock having been prepared at low MOI. This highlights  
273 the difficulty in producing a completely DIP-free virus preparation.  
274

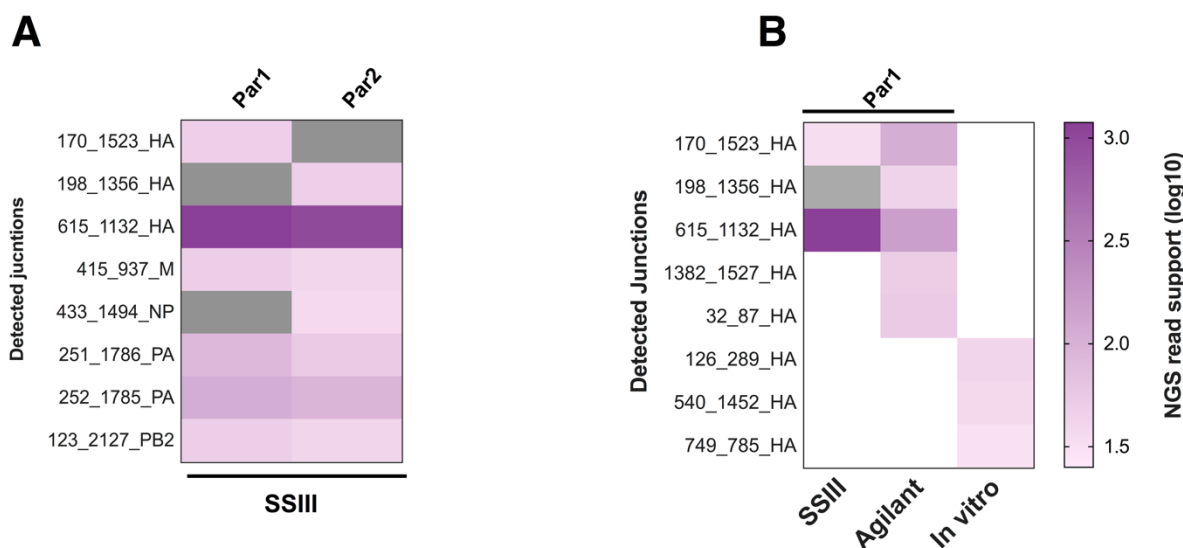

**Fig 3. DIP-associated deletion junctions present in virus working stock.** We performed two independent RNA extractions, RT reactions, PCR amplifications, and library preparations from a single recombinant Cal07 working stock grown at low MOI (Par1 and Par2). **(A)** Comparison of deletion junctions detected in Par1 and Par2 samples. Purple blocks represent instances where junction was detected but read support was below RSC **(B)** Comparison of HA segment junctions detected in two libraries generated from independent RT reactions using two different RT enzymes, along with a library generated from in vitro T7-transcribed viral RNA. White blocks denote no detection

275  
276

### 277 **Generation of DIP-enriched populations through high MOI passage**

278 To test the ability of the pipeline to detect real DIP-associated RNAs, we enriched for  
279 DIPs through serial undiluted passage of Cal07 in MDCK cells. We confirmed the  
280 presence of DIPs by amplifying full-length genomic cDNA at each passage and examining  
281 the size distribution of PCR products by gel electrophoresis (**Fig 4A**), as previously  
282 described (21). The gradual disappearance of the polymerase segments, which form the  
283 majority of DIPs, and the appearance of a smear below the shortest IAV segment (NS  
284 ~0.9kb) were consistent with the accumulation of DIPs over passage. Based on these  
285 results, we picked P1, P3, and P6 as representative samples for sequencing.



286  
287 We further confirmed the presence of DIPs by plotting the read coverage of the aligned  
288 reads from passages 1, 3, and 6 (**Fig 4B**). These coverage plots clearly reveal the  
289 characteristic pattern of DIP-rich populations, with much lower depth of read alignment in  
290 the middle portion of the segment compared with the termini. As expected, the number of  
291 DIP-associated deletion junctions detected by the pipeline also increased across  
292 passages, reaching the highest level at passage 6 (**Fig 4C**). To confirm that these  
293 junction-containing sequences were derived from virion rather than cellular RNA, we  
294 measured the number of reads that aligned to the host (canine) genome in our samples.  
295 We found very few reads derived from the canine genome in all the passages, compared  
296 with about 40% of the reads from RNA extracted from infected cells (**Fig S4**).  
297

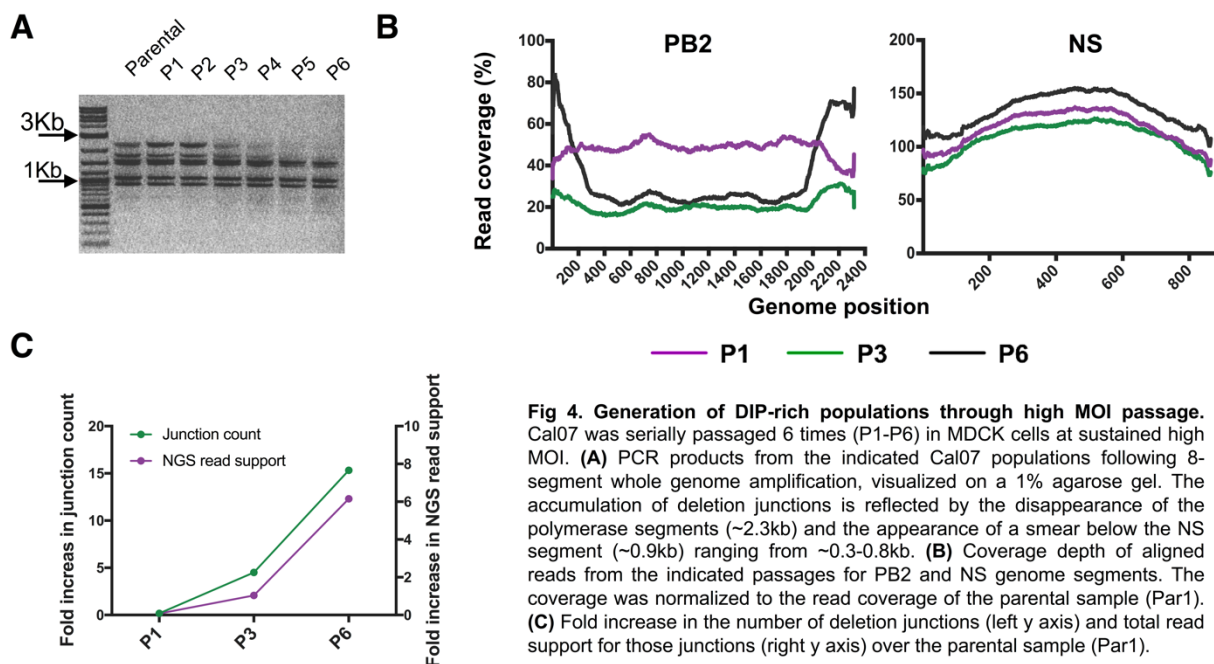

**Fig 4. Generation of DIP-rich populations through high MOI passage.** Cal07 was serially passaged 6 times (P1-P6) in MDCK cells at sustained high MOI. **(A)** PCR products from the indicated Cal07 populations following 8-segment whole genome amplification, visualized on a 1% agarose gel. The accumulation of deletion junctions is reflected by the disappearance of the polymerase segments (~2.3kb) and the appearance of a smear below the NS segment (~0.9kb) ranging from ~0.3-0.8kb. **(B)** Coverage depth of aligned reads from the indicated passages for PB2 and NS genome segments. The coverage was normalized to the read coverage of the parental sample (Par1). **(C)** Fold increase in the number of deletion junctions (left y axis) and total read support for those junctions (right y axis) over the parental sample (Par1).

298  
299  
300 **Reproducibility of pipeline performance**  
301 Multiple steps in the combined experimental/computational pipeline could introduce  
302 stochasticity into the pipeline performance, thus diminishing overall consistency and  
303 reproducibility of output. To examine the reproducibility of our pipeline's performance, we  
304 sequenced two separate extractions of a single P6 population (Hereafter known as L1-  
305 P6-Rep1 and L1-P6-Rep2, where L refers to lineage) and compared the pipeline outputs  
306 between the two replicates (**Fig S5**). We found that the normalized read support values  
307 of individual junctions were highly correlated between the two replicate samples, whether  
308 the replicates were sequenced on the same MiSeq flowcell (Spearman R = 0.92) or  
309 separate ones (Spearman R = 0.91). Thus, the combined steps from RNA extraction to  
310 sequence analysis introduce minimal noise into the pipeline output, and pipeline  
311 performance is highly reproducible between experiments.  
312

313 **Optimization of minimum read support cutoffs**

314 Our experiments using simulated datasets revealed the importance of setting minimal  
315 RSCs for maximizing the accuracy of pipeline performance, and suggested that the  
316 optimal RSC may differ between datasets. We next attempted to optimize RSC values for  
317 our experimental dataset where we did not actually know the precise location and number  
318 of junctions present in the population (as we did with our simulated datasets). To quantify  
319 precision in junction detection for our experimental dataset, we assumed that base calling  
320 errors and mutations that result in inaccurate junction reporting would be stochastic and  
321 thus read support for these inaccurate junctions would be highly variable between  
322 technical replicates. In contrast, read support for real junctions should be consistent  
323 between replicates.

324  
325 We assessed the effects of varying the RSC on the degree of correlation between  
326 junctions identified in L1-P6-Rep1 and L1-P6-Rep2. We varied the RSC values from 1 to  
327 50 for each individual genome segment, and examined the effect on the number of  
328 reported junctions (**Fig 5**). We observed a similar pattern to that observed for our  
329 simulated data, where raising the RSC to 10 or higher resulted in a large drop-off in the  
330 number of reported junctions. We next determined the RSC value that yielded the highest  
331 degree of correlation between the two replicates. We identified distinct optimal RSC cutoff  
332 values for each segment: 20, 20, 30, 30, and 15 for PB2, PB1, PA, HA, and NA,  
333 respectively. The average of these values was used as an RSC for the remaining  
334 segments where no enough junctions were detected to perform the correlation test (see  
335 below).

336  
337 We do not expect these values to be universal, as they likely are influenced by a number  
338 of factors that will vary between individual sequencing runs. Also, for different  
339 applications, it may be beneficial to lower the RSC to improve detection sensitivity at the  
340 cost of precision. Thus, we suggest running two technical replicates with each NGS run  
341 to be used as reference to establish optimal per-segment RSC values for that run.  
342

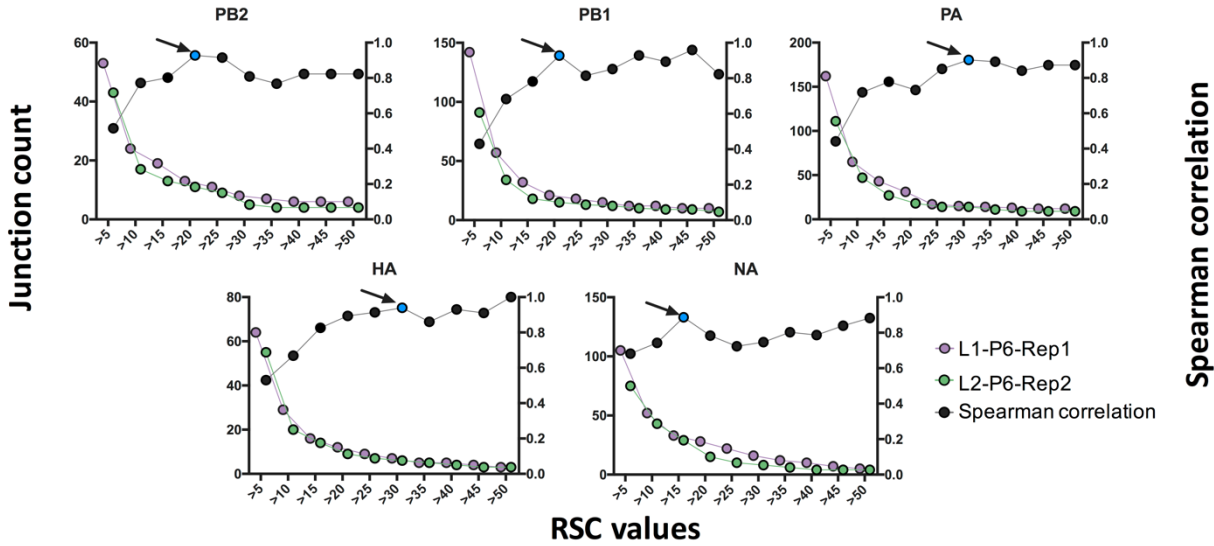

**Fig 5. Determination of optimal read support cutoffs for experimental data.** Plots showing the numbers of deletion junctions reported in the indicated genome segments for two technical library preparation and sequencing replicates generated from a single DIP-rich viral population (L1-P6-Rep1 and L2-P6-Rep2; left y axis). Black dots represent the results of Spearman correlation tests between the replicates at each RSC condition (right y axis). Blue dots indicate the point with the highest degree of correlation and minimum decrease of junction count for each genome segment.

343  
344

### 345 **Analysis of DIP-associated deletion profiles**

346 We next examined the overall diversity of DIP-associated deletion junctions within the P6  
347 populations from the two independent lineages (L1-P6-Rep1 and L2-P6), and found  
348 dozens of distinct deletion junctions scattered across the viral genome in both lineages  
349 (**Fig 6A**). Junctions were not evenly distributed across the genome segments, as few to  
350 no junctions were detected in the NP, M, or NS segments. Within each segment, the read  
351 support for individual junctions varied significantly (**Fig 6B**). When we compared the  
352 deletion junction repertoires between the two passage lineages, we observed that a  
353 significant fraction of the detected junctions was shared between the two, and that these  
354 shared junctions exhibited a high degree of correlation in terms of read support (**Fig 6C**).  
355 These data suggest that specific DIP-associated deletions may be consistently formed by  
356 Cal07. While there was substantial diversity in terms of the number of distinct deletion  
357 junctions present, when we plotted the locations of those these junctions within the  
358 genome segments, we observed that they were largely confined within clear hotspots  
359 towards the termini of the segments with few exceptions (**Fig 6D**).

360

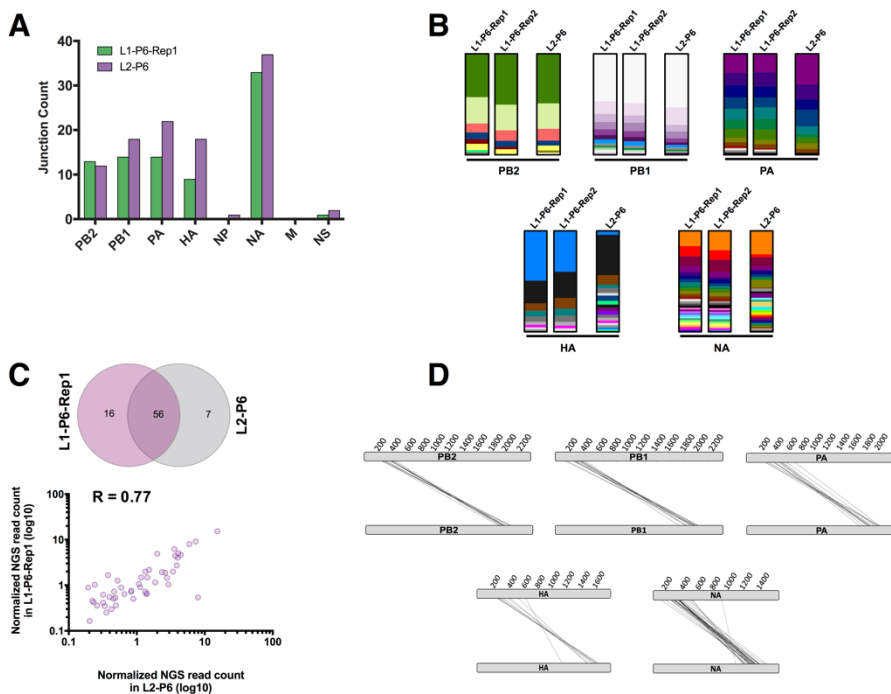

**Fig 6. DIP-associated junctions analysis.** (A) The total number of detected junctions in the individual genome segments for the two independent passage 6 populations. (B) Stacked column charts showing the proportional abundance of each deletion junction per segment between lineage 1 (including both technical replicates) and lineage 2 at passage 6. Each color bar represents a unique junction within each segment, whose height reflects the relative NGS read support, normalized to the total number of NGS junction-spanning reads for the indicated segment. (C) Comparison between L1-P6-REP1 and L2-P6 in relation to the number of shared junctions (upper panel) and the correlation between their NGS reads (lower panel) (D) Parallel coordinates diagrams showing the deletion junctions in P6-Rep1 mapped to their actual respective locations on each segment. Each individual junction is represented by a black line that connects the donor and acceptor sites of the breakpoint.

361  
362

### Effect of varying template input on pipeline performance

363 We next asked whether the amount of cDNA template that goes into the library  
364 preparation affects the sensitivity and stochasticity of junction detection by the pipeline.  
365 We serially diluted both the amount of viral RNA template used in the RT reaction and the  
366 amount of cDNA template used in the PCR and compared pipeline outputs from the DIP-  
367 rich L1-P6-Rep1 population. We first tested the correlation of detected DIP-associated  
368 junctions between a limited number of dilutions ranging from 1:3 to 1:15. We observed  
369 that the correlation of read support values between dilution specific junctions across dilutions was  
370 more consistent when cDNA was diluted, rather than RNA, suggesting that RNA dilution  
371 may increase the stochasticity of downstream PCR amplification (**Fig S6A**).

372  
373 Based on this, we performed whole genome PCR using a dilution series of L1-P6-Rep1-  
374 derived cDNA (spanning roughly  $4 \times 10^8$  to  $4 \times 10^6$  NP genome equivalents per PCR) as  
375 template (**Fig 7A**). We observed that there is an optimal amount of input cDNA template  
376 for maximizing junction detection. Diluting the input cDNA 1:120 (corresponding to  $\sim 4 \times 10^6$   
377 NP genome equivalents) increased the number of detected junctions over 4-fold  
378 compared with undiluted input. Although the number of DIP-associated junctions was  
379 increased, the distribution of junctions across segments and their mapped locations were  
380 consistent with our earlier results (**Fig S6B and Fig 6**).

381  
382 Further dilution of input template beyond 1:120 resulted in a decrease in sensitivity.  
383 Importantly, dilution across the range tested did not result in a failure to detect any of the  
384 junctions reported in the undiluted sample. We also observed that the correlation of read  
385 support values between specific junctions across dilutions tracked closely with the  
386 sensitivity (**Fig 7B**). Altogether, these observations indicate that optimization of the cDNA  
387

388 template input amount can significantly improve the sensitivity of DIP-associated junction  
389 detection.  
390

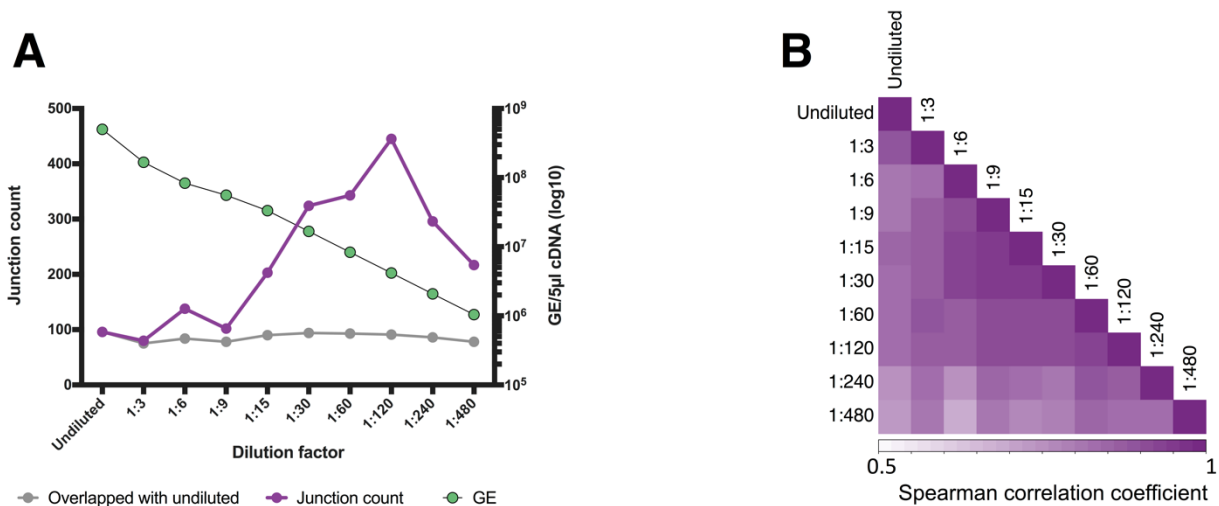

**Fig 7. Effects of viral template input on the detection of DIP-associated junctions.** We serially diluted cDNA generated from the L1-P6-Rep1 sample, and compared sequencing results between libraries generated with these dilutions as templates. **(A)** For each dilution, the total numbers of detected junctions (purple) are shown, along with the number of specific junctions detected that were also detected in the undiluted sample (grey). The copy number of viral cDNA molecules included in downstream PCR and library preparation for each dilution was determined by RT-qPCR (green; right y axis). **(B)** Read support values for all deletion junctions common across the diluted and undiluted samples were normalized to the total number of deletion junction-spanning reads for each sample and used to perform a Spearman correlation between all pairs of samples using R cor function.

391  
392

### 393 **Lack of association between direct repeats and junction formation**

394 Direct repeat sequences (detailed in **Fig S2 and S3A**) are common across the IAV  
395 genome and have previously been hypothesized to contribute to DIP-associated deletion  
396 formation by promoting viral polymerase slippage (10, 15). We leveraged the large  
397 number of DIP-associated deletion junctions that we identified in this study to test this  
398 hypothesis. We asked whether the deletion junctions in the DIP-enriched sample L1-P6-  
399 Rep1 were found more frequently adjacent to direct repeats than would be expected if  
400 the junctions were located randomly in the viral genome. We compared the frequency of  
401 deletion junctions associated with direct repeats between the L1-P6-Rep1 and L2-P6  
402 populations (where all deletions are formed by the viral RdRp) and the Cal07-200  
403 simulated dataset, where all deletions are randomly localized (**Fig 8**). The frequency of  
404 direct repeats of varying lengths at junction sites in the real viral populations was not  
405 significantly different than that seen in the simulated data, indicating that direct repeat  
406 sequences are not enriched at DIP-associated junctions and arguing against a significant  
407 role for direct repeats in DIP formation.

408

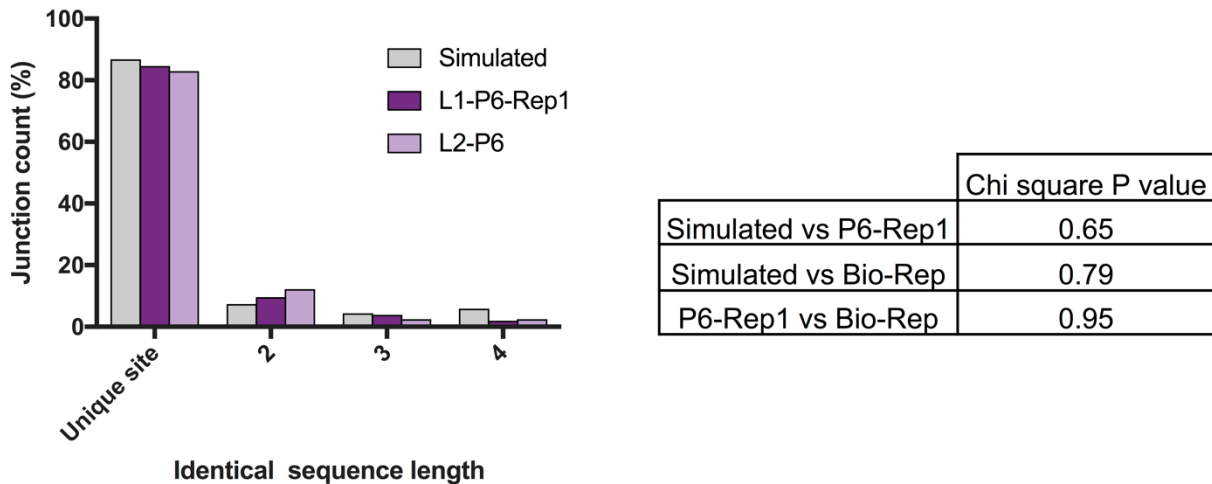

**Fig 8. Direct repeat sequences are not over-represented at DIP-associated deletion junctions.** The percentages of deletion junctions within the polymerase segments that occurred at unique sites or at sites with direct nucleotide repeats with lengths 2-4nts was compared between L1-P6-Rep1, L2-P6, and the Cal07-200 simulated dataset. The number of junctions was plotted and compared by Chi Square. The table shows the Chi Square P values between every possible pair of the samples.

409  
410

## 411 DISCUSSION

412 Sensitive and accurate detection of DIP-associated sequences within viral populations is  
413 critical for defining how DIPs form and function during IAV infection. Here we outline a  
414 pipeline to detect DIP-associated junctions within viral populations using Illumina-based  
415 short read sequencing, and validate its performance using a combination of simulated  
416 and experimental control datasets.

417

418 Our primary goal was to develop and optimize a reasonably simple and straightforward  
419 sequencing framework that accounts for the potential artifacts that can potentially  
420 confound NGS-based DIP detection efforts. We chose the Illumina sequencing platform  
421 because it is widely available, easy to use, conducive to sample multiplexing, and  
422 because it has a relatively low rate of base-calling errors. One concern that we had initially  
423 was that recombination during reverse transcription, PCR, or sequencing might make  
424 identification of bona fide DIP-associated junctions a challenge. Two recently developed  
425 technologies, CirSeq and ClickSeq, largely eliminate this issue, but also significantly  
426 increase the amount of labor involved in library preparation (22, 23). We observed that  
427 the occurrence of non-viral recombination that occurs during our library preparation and  
428 sequencing procedures was vanishingly small, and can effectively be ignored. Thus, while  
429 both Cirseq and ClickSeq are enormously useful in certain circumstances, our data

430 indicates that such methods are not required to generate highly accurate and sensitive  
431 profiles of IAV DIPs.

432  
433 A significant shortcoming of the method we detail here is that the measured read support  
434 for individual deletion junctions does not necessarily reflect the actual frequencies of  
435 these deletions within the viral population. This is due to both biasing of PCR amplification  
436 towards shorter products, as well as the uneven distribution of read coverage across the  
437 viral genome. For situations where the accurate measurement of individual DIP genotype  
438 frequencies is critical, we recommend pairing a cDNA barcoding method such as primer  
439 ID (24, 25) with a platform capable of long-read sequencing, such as PacBio or Oxford  
440 Nanopore (26). Alternatively, direct sequencing of viral RNA using the Oxford Nanopore  
441 platform may also prove to be useful for accurate measurement of junction frequencies  
442 (27).

443  
444 When we used our pipeline to examine DIP-enriched viral populations generated through  
445 serial high-MOI passage, we detected dozens of distinct DIP-associated deletion  
446 junctions, revealing a high degree of diversity within the DIP population. Although the  
447 majority of these DIP-associated junctions were derived from the polymerase segments  
448 as expected, we also detected a substantial proportion of deletions within the HA and NA  
449 segments, but not the NP, M, and NS segments. The non-random distribution of junctions  
450 across the genome segments mirrors what has been reported elsewhere, and highlights  
451 how little we know about the specific molecular mechanisms that regulate DIP formation.

452  
453 We hope that the approach detailed here, and the associated bioinformatics pipeline  
454 prove useful to other groups interested in defective interfering particle biology. Our  
455 approach is optimized for influenza virus sequences; however, the approaches and  
456 controls detailed here can easily be adapted to other RNA virus systems.

457

## 458 **MATERIALS AND METHODS**

### 459 **Viruses and Cells**

460 Madin-Darby canine kidney cells (MDCK; obtained from Dr. Jonathan Yewdell) and  
461 human embryonic kidney 293 cells (293T; obtained from Dr. Joanna Shisler) were grown  
462 in Minimal Essential Medium (MEM) + GlutaMAX (Gibco), supplemented with 8.3% fetal  
463 bovine serum (Seradigm), at 37°C and 5% CO<sub>2</sub>. Recombinant A/California/07/09 (Cal07)  
464 virus was rescued via the standard 8-plasmid reverse genetics approach. Briefly, 60-90%  
465 confluent 293T cells were transfected with 500ng of the following plasmids (pDZ::PB2,  
466 pDZ::PB1, pDZ::PA, pDZ::HA, pDZ::NP, pDZ::NA, pDZ::M, pDZ::NS) using JetPRIME  
467 (Polyplus) according to the manufacturer's instructions. Cal07 reverse genetics plasmids  
468 were originally obtained as A/California/04/2009-encoding plasmids from Dr. Jonathan  
469 Yewdell. We introduced A660G and A335G substitutions into the HA and NP plasmids,  
470 respectively, to convert them to match the amino acid sequence of A/California/07/2009  
471 HA and NP (NCBI accession# CY121680, CY121683). A seed stock was prepared by  
472 amplifying a plaque isolate from the rescue supernatants. Virus working stocks were  
473 generated by infecting MDCK cells with seed stock at an MOI of 0.001 TCID<sub>50</sub>/cell and

474 collecting and clarifying supernatants at 48 hpi.

#### 475 **Generation of DIP stocks through high MOI passage**

476 Confluent MDCK cells in 96-well plates were infected with IAV Cal07 at an MOI of 5  
477 TCID<sub>50</sub>/cell. Supernatants (200 $\mu$ l total per well) were harvested at 24 hpi (passage 1)  
478 and pooled. 100 $\mu$ l/well of this pooled supernatant was used to infect a 96 well plate of  
479 fresh MDCK cells to generate the next passage. This process was repeated 6 times to  
480 produce passages 1-6 in two independent lineages (1 96-well plate per lineage).

#### 481 **IAV Genome amplification**

482 Viral RNA was extracted from 140 $\mu$ l of cell culture supernatant using the QIAamp viral  
483 RNA kit (Qiagen) and eluted in 60 $\mu$ l distilled H<sub>2</sub>O (dH<sub>2</sub>O). For cDNA reactions, 3 $\mu$ L of  
484 RNA was mixed with 1 $\mu$ L (2 $\mu$ M) MBTUni-12 primer (5'-  
485 ACGCGTGATCAGCRAAAGCAGG-3') + 1 $\mu$ L (10 $\mu$ M) dNTPs + 8 $\mu$ L dH<sub>2</sub>O. The mixture  
486 was incubated for 5 minutes at 65°C and then placed on ice for 2 min. Subsequently, the  
487 mixture was removed from ice and the following was added: 1 $\mu$ L SuperScript III RT  
488 (Invitrogen), 4 $\mu$ L of 5X First-Strand Buffer (Comes with SSIII kit), 1 $\mu$ L of DTT, 1 $\mu$ L RNase-  
489 in (Invitrogen). The reaction was incubated at 45°C for 50 min, followed by a 15 min  
490 incubation at 70°C for inactivation. 5 $\mu$ L of cDNA product was mixed with the following for  
491 PCR amplification: 2.5 $\mu$ L (10 $\mu$ M) MBTUni-12\_4R primer (5'-  
492 ACGCGTGATCAGCRAAAGCAGG-3'), 2.5 $\mu$ L (10 $\mu$ M) MBTUni-13 primer (5'-  
493 ACGCGTGATCAGTAGAAACAAGG-3'), 0.5 $\mu$ L Phusion polymerase (NEB), 10 $\mu$ L - 5x HF  
494 buffer, 1 $\mu$ L (10mM dNTPs mix), and 28.5 $\mu$ L dH<sub>2</sub>O. The PCR reaction conditions used:  
495 98°C (30 s) followed by 25 cycles of 98°C (10 s), 57°C (30 s) and 72°C (1:30 min), a  
496 terminal extension of 72°C (5 min), and a final 10°C hold. PCR products were purified  
497 using the PureLink PCR purification kit (Invitrogen) with the <300nt cutoff option and  
498 eluted in 30 $\mu$ L dH<sub>2</sub>O. There was no difference in deletion junction detection when we  
499 purified the PCR products with the lower cutoff option (data not shown).

500

#### 501 **NGS library preparation**

502 We started with ~20ng of the PCR products in a volume of 50 $\mu$ l. The Covaris M220  
503 sonicator (Covaris) was used to fragment the DNA. Three different conditions were used  
504 to generate different average fragment lengths of 300, 500, 700 base pairs (bp): (I) 300  
505 bp = Peak Power 50, Duty Factor 20 and Cycles/Burst 200 for 2:40 min, (II) 500 bp =  
506 Peak Power 50, Duty Factor 10 and Cycles/Burst 200 for 1:30 min, and (III) ~600 bp =  
507 fragment length Peak Power 50, Duty Factor 10 and Cycles/Burst 200 for 1 min. In our  
508 hands, the fragmentation length did not have any effect on our sequencing results (data  
509 not shown). For the sake of consistency, we used the 300 bp fragmentation length. To  
510 confirm the PCR products, we visualized the amplicons on a Fragment Analyzer (AATI)  
511 with the DNF-486 high sensitivity NGS kit before and after fragmentation. Next, we used  
512 KAPA Hyper Prep kit (Roche) to construct the libraries according to the manual. To  
513 eliminate the possibility of index hopping (or index switching), we used the TruSeq Unique  
514 Dual Indexes (UDI) from Illumina. The Adapter ligation step was carried out with 5 $\mu$ l of  
515 Truseq UDIs diluted 1:10 with 10nM Tris. For maximum efficiency we increased the  
516 ligation time to 30mins. We then performed 3 cycles of PCR with the Kapa library



517 amplification primers diluted 1:5 in water followed by a cleanup step with 40 $\mu$ l of AxyPrep  
518 Mag PCR beads (Thermofisher). We then mixed the libraries at an equimolar ratio and  
519 carried out a qPCR to accurately quantitate the library pool and maximize the number of  
520 clusters in the sequencing flowcell. A size selection step was not needed. Finally, the  
521 pooled libraries were sequenced with paired-ends 2x250nt reads on an Illumina MiSeq  
522 using V2 chemistry. The fastq files were generated and demultiplexed with the bcl2fastq  
523 v2.20 Conversion Software (Illumina).

524

### 525 **Simulated Datasets**

526 All the simulated datasets used in this study were generated by MetaSim (v0.9.1) (28),  
527 a genomic and metagenomics simulator. Several reference library sequences composed  
528 of WT reference sequences of IAV Cal07 or PR8 (see Table S1 for NCBI accession  
529 numbers), mixed with a defined DIP sequence population - generated randomly within  
530 the first and last 600 nts of all the segments - were used in Metasim for data simulation.  
531 The configurations were fixed across all datasets to maintain the preferable conditions.  
532 The reference sequences were fragmented into 350 nts fragments length with a standard  
533 deviation of +/- 50 and were simulated into ~1 million 2x250nts paired-end reads per  
534 sample, with a total mutation rate of ~1% based on the published Illumina empirical error  
535 model, and corresponds to substitutions as the indel error rate is negligible within Illumina  
536 MiSeq. One dataset was simulated with no DIP sequences as a control sample for any  
537 computational artifacts. Metasim generated two FASTA files of 1 million reads per file per  
538 sample (~2 million single-end reads = 1 million paired-end reads), which subsequently  
539 were used for the optimization process.

### 540 **Sequencing analysis of DIP-associated junctions**

541 The raw sequencing reads were quality-filtered by Trimmomatic (v0.36) (Parameters:  
542 ILLUMINACLIP:TruSeq3-PE-2.fa:2:15:10 SLIDINGWINDOW:3:20  
543 LEADING:28 TRAILING:28) (29) and any reads shorter than 75nts were removed from  
544 the datasets. The paired reads were concatenated into one file and treated as single-end  
545 when aligned end-to-end to the WT reference sequences using Bowtie2 (v2.3.1)  
546 (Parameters: --score-min L, 0, -0.3). Subsequently, the algorithm ViReMa (v0.10) was  
547 used to analyze the remaining un-aligned reads (putative junction-spanning reads)  
548 (Parameters -DeDup --MicroInDel\_Length 20 --Defuzz 3 --N 1 --X 8).  
549 Next, the DIP-associated deletion junctions and their read support were extracted from  
550 ViReMa output files and sorted per segment, using an in-house Perl scrip, for data  
551 analysis and visualization. To detect any MDCK genome leakage, the datasets were  
552 aligned against the dog genome (assembly CanFam3.1). All scripts are available at  
553 <https://github.com/BROOKELAB/Influenza-virus-DI-identification-pipeline>.

554

### 555 **Quantification of sensitivity and precision**

556 To calculate the actual number of junction-spanning reads in Fig 2A, reads that derived  
557 from DIP-associated sequences were counted by their FASTA headers, which contain  
558 the source of each read, produced by MetaSim. To calculate the maximum theoretical  
559 sensitivity of ViReMa (Fig 2B) based on seed length of 25nts and two allowed mutations  
560 (--N = 2), the number of mutations was subtracted from the seed length, which on its turn

561 was multiplied by 2 to account for both termini  $((25-2)*2=46)$ . Subsequently, this number  
562 was subtracted from the possible cutting site of a 250nts read and divided by the total  
563 number of cutting sites and multiplied by 100  $((249-46)/249*100)=81.5\%$ . To calculate  
564 the number of accurately and inaccurately mapped junctions in Fig 2C,D, the seed  
565 sequences of the Cal07-200 dataset were used against ViReMa with --N set to 0, and the  
566 remaining parameters were kept the same. These sequences were generated initially to  
567 establish the seed for MetaSim to simulate sequencing, therefore their lengths are varied  
568 between ~350-1800. The long ones were trimmed to <1000nts, so ViReMa would take  
569 them as reads (the maximum default read length that ViReMa could take is ~1024nts)  
570 and, critically, the junction locations were maintained. The junctions that occurred within  
571 the first or last 25nts were removed (4 junction sequences). Finally, the junctions that  
572 accurately mapped were counted, which found to be 149 versus 47 inaccurately mapped  
573 junctions.

574

### 575 **Correlation analysis**

576 For the correlation tests, the NGS read support count for each DIP-associated junction  
577 was normalized to the total detected junction-spanning reads of every sample. Next, the  
578 correlation was calculated based on Spearman rank correlation using either R (cor  
579 function) or an online tool at:

580 <http://www.biostathandbook.com/spearman.html>

581

### 582 **ACKNOWLEDGMENTS**

583 We are grateful to other members of the lab for helpful comments and critical reading of  
584 the manuscript, as well as to Dr. Alvaro Hernandez and the staff at the high-through  
585 sequencing and genotyping unit within the Roy J. Carver Biotechnology Center for  
586 excellent advice and technical assistance. This work was generously funded by the  
587 Defense Advanced Research Projects Agency under contract DARPA-16-35-  
588 INTERCEPT-FP-018.

589

### 590 **REFERENCES**

- 591 1. Von Magnus P. 1954. Incomplete forms of influenza virus. *Adv Virus Res* 2:59–79.
- 592 2. von MAGNUS P. 1951. Propagation of the PR8 strain of influenza A virus in chick  
593 embryos. II. The formation of incomplete virus following inoculation of large doses of  
594 seed virus. *Acta Pathol Microbiol Scand* 28:278–293.
- 595 3. Rezelj VV, Levi LI, Vignuzzi M. 2018. The defective component of viral populations.  
596 *Curr Opin Virol* 33:74–80.
- 597 4. Baum A, Sachidanandam R, García-Sastre A. 2010. Preference of RIG-I for short  
598 viral RNA molecules in infected cells revealed by next-generation sequencing. *Proc*  
599 *Natl Acad Sci U S A* 107:16303–16308.

- 600 5. Nayak DP, Chambers TM, Akkina RK. 1985. Defective-interfering (DI) RNAs of  
601 influenza viruses: origin, structure, expression, and interference. *Curr Top Microbiol*  
602 *Immunol* 114:103–151.
- 603 6. Brooke CB. 2017. Population Diversity and Collective Interactions during Influenza  
604 Virus Infection. *J Virol* 91.
- 605 7. Vasilijevic J, Zamarreño N, Oliveros JC, Rodriguez-Frandsen A, Gómez G,  
606 Rodriguez G, Pérez-Ruiz M, Rey S, Barba I, Pozo F, Casas I, Nieto A, Falcón A.  
607 2017. Reduced accumulation of defective viral genomes contributes to severe  
608 outcome in influenza virus infected patients. *PLOS Pathog* 13:e1006650.
- 609 8. Sherry L, Punovuori K, Wallace LE, Prangle E, DeFries S, Jackson D. 2016.  
610 Identification of cis-acting packaging signals in the coding regions of the influenza B  
611 virus HA gene segment. *J Gen Virol* 97:306–315.
- 612 9. Hutchinson EC, von Kirchbach JC, Gog JR, Digard P. 2010. Genome packaging in  
613 influenza A virus. *J Gen Virol* 91:313–328.
- 614 10. Jennings PA, Finch JT, Winter G, Robertson JS. 1983. Does the higher order  
615 structure of the influenza virus ribonucleoprotein guide sequence rearrangements in  
616 influenza viral RNA? *Cell* 34:619–627.
- 617 11. Routh A, Johnson JE. 2014. Discovery of functional genomic motifs in viruses  
618 with ViReMa-a Virus Recombination Mapper-for analysis of next-generation  
619 sequencing data. *Nucleic Acids Res* 42:e11.
- 620 12. Langmead B, Salzberg SL. 2012. Fast gapped-read alignment with Bowtie 2. *Nat*  
621 *Methods* 9:357–359.
- 622 13. Jennings PA, Finch JT, Winter G, Robertson JS. 1983. Does the higher order  
623 structure of the influenza virus ribonucleoprotein guide sequence rearrangements in  
624 influenza viral RNA? *Cell* 34:619–627.
- 625 14. Janda JM, Davis AR, Nayak DP, De BK. 1979. Diversity and generation of  
626 defective interfering influenza virus particles. *Virology* 95:48–58.
- 627 15. Saira K, Lin X, DePasse JV, Halpin R, Twaddle A, Stockwell T, Angus B, Cozzi-  
628 Lepri A, Delfino M, Dugan V, Dwyer DE, Freiberg M, Horban A, Losso M, Lynfield R,  
629 Wentworth DN, Holmes EC, Davey R, Wentworth DE, Ghedin E, INSIGHT FLU002  
630 Study Group, INSIGHT FLU003 Study Group. 2013. Sequence analysis of in vivo  
631 defective interfering-like RNA of influenza A H1N1 pandemic virus. *J Virol* 87:8064–  
632 8074.

- 633 16. Loman NJ, Misra RV, Dallman TJ, Constantinidou C, Gharbia SE, Wain J, Pallen  
634 MJ. 2012. Performance comparison of benchtop high-throughput sequencing  
635 platforms. *Nat Biotechnol* 30:434–439.
- 636 17. Schirmer M, Ijaz UZ, D’Amore R, Hall N, Sloan WT, Quince C. 2015. Insight into  
637 biases and sequencing errors for amplicon sequencing with the Illumina MiSeq  
638 platform. *Nucleic Acids Res* 43:e37.
- 639 18. Zhou B, Donnelly ME, Scholes DT, St George K, Hatta M, Kawaoka Y,  
640 Wentworth DE. 2009. Single-reaction genomic amplification accelerates sequencing  
641 and vaccine production for classical and Swine origin human influenza A viruses. *J*  
642 *Virology* 83:10309–10313.
- 643 19. Görzer I, Guelly C, Trajanoski S, Puchhammer-Stöckl E. 2010. The impact of  
644 PCR-generated recombination on diversity estimation of mixed viral populations by  
645 deep sequencing. *J Virol Methods* 169:248–252.
- 646 20. Lahr DJG, Katz LA. 2009. Reducing the impact of PCR-mediated recombination  
647 in molecular evolution and environmental studies using a new-generation high-  
648 fidelity DNA polymerase. *BioTechniques* 47:857–866.
- 649 21. Xue J, Chambers BS, Hensley SE, López CB. 2016. Propagation and  
650 Characterization of Influenza Virus Stocks That Lack High Levels of Defective Viral  
651 Genomes and Hemagglutinin Mutations. *Front Microbiol* 7:326.
- 652 22. Routh A, Head SR, Ordoukhanian P, Johnson JE. 2015. ClickSeq:  
653 Fragmentation-Free Next-Generation Sequencing via Click Ligation of Adaptors to  
654 Stochastically Terminated 3'-Azido cDNAs. *J Mol Biol* 427:2610–2616.
- 655 23. Acevedo A, Andino R. 2014. Library preparation for highly accurate population  
656 sequencing of RNA viruses. *Nat Protoc* 9:1760–1769.
- 657 24. Kosik I, Ince WL, Gentles LE, Oler AJ, Kosikova M, Angel M, Magadán JG, Xie  
658 H, Brooke CB, Yewdell JW. 2018. Influenza A virus hemagglutinin glycosylation  
659 compensates for antibody escape fitness costs. *PLOS Pathog* 14:e1006796.
- 660 25. Jabara CB, Jones CD, Roach J, Anderson JA, Swanstrom R. 2011. Accurate  
661 sampling and deep sequencing of the HIV-1 protease gene using a Primer ID. *Proc*  
662 *Natl Acad Sci U S A* 108:20166–20171.
- 663 26. Jaworski E, Routh A. 2017. Parallel ClickSeq and Nanopore sequencing  
664 elucidates the rapid evolution of defective-interfering RNAs in Flock House virus.  
665 *PLOS Pathog* 13:e1006365.
- 666 27. Galalde DR, Snell EA, Jachimowicz D, Sipos B, Lloyd JH, Bruce M, Pantic N,  
667 Admassu T, James P, Warland A, Jordan M, Ciccone J, Serra S, Keenan J, Martin

- 668 S, McNeill L, Wallace EJ, Jayasinghe L, Wright C, Blasco J, Young S, Brocklebank  
669 D, Juul S, Clarke J, Heron AJ, Turner DJ. 2018. Highly parallel direct RNA  
670 sequencing on an array of nanopores. *Nat Methods* 15:201–206.
- 671 28. Richter DC, Ott F, Auch AF, Schmid R, Huson DH. 2008. MetaSim—A  
672 Sequencing Simulator for Genomics and Metagenomics. *PLOS ONE* 3:e3373.
- 673 29. Bolger AM, Lohse M, Usadel B. 2014. Trimmomatic: a flexible trimmer for  
674 Illumina sequence data. *Bioinforma Oxf Engl* 30:2114–2120.
- 675 30. Li H, Handsaker B, Wysoker A, Fennell T, Ruan J, Homer N, Marth G, Abecasis  
676 G, Durbin R, 1000 Genome Project Data Processing Subgroup. 2009. The  
677 Sequence Alignment/Map format and SAMtools. *Bioinforma Oxf Engl* 25:2078–  
678 2079.
- 679 31. Quinlan AR, Hall IM. 2010. BEDTools: a flexible suite of utilities for comparing  
680 genomic features. *Bioinforma Oxf Engl* 26:841–842.
- 681
